# Supplementary material for: Transcriptome profiling reveals mechanisms for the evolution of insect seasonality
Source: Oxford University Press journal article supplement (doi:10.1242/jeb.126136), 2015-01-01
Supplement: jeb126136supp.pdf [file jeb126136supp.pdf]

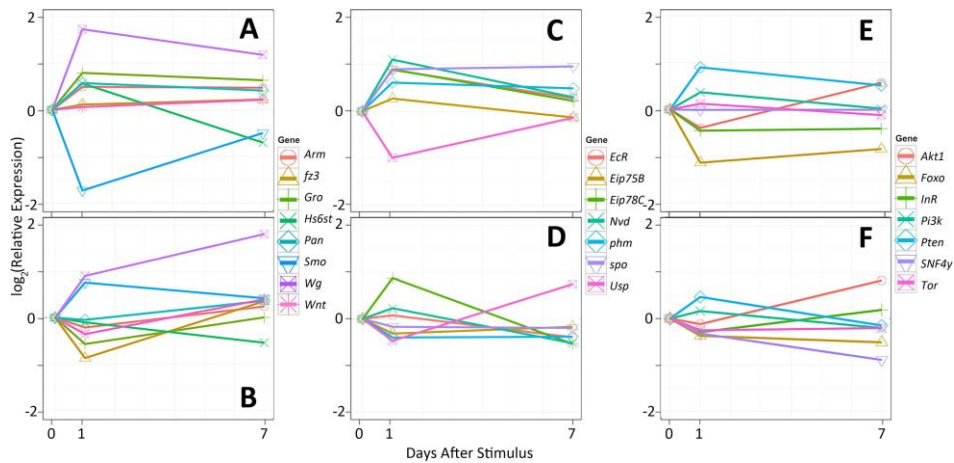

**Fig. S1.** Gene expression trajectories from short-day to long-day conditions for (A) E-strain Wnt signaling genes, (B) Z-strain Wnt signaling genes, (C) E-strain ecdysone-related genes, (D) Z-strain ecdysone-related genes, (E) E-strain insulin signaling genes, and (F) Z-strain insulin signaling genes.

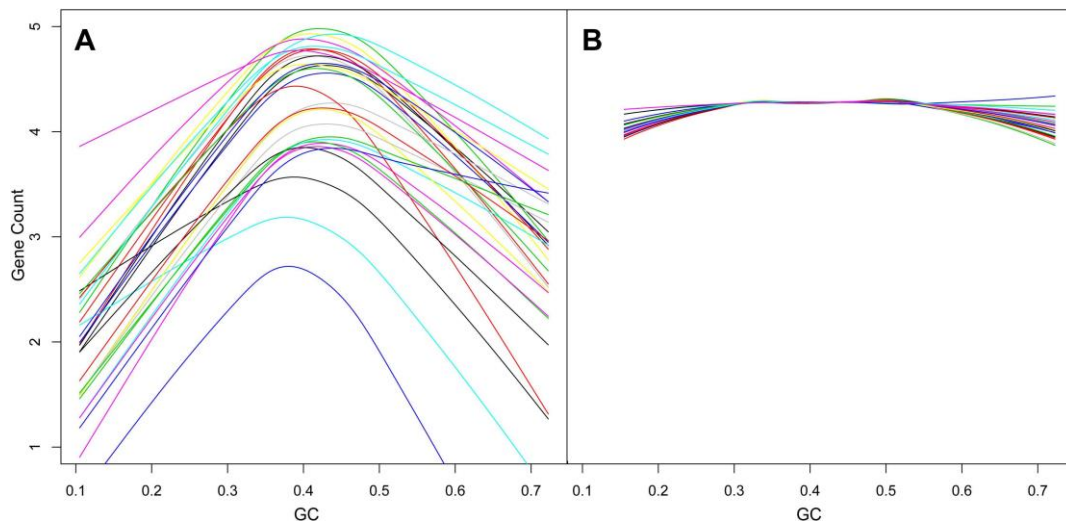

**Fig. S2.** GC normalization in EDaseq. (A) Lowess regression of log gene-level counts on GC content for each library. (B) Full quantile within and between lane normalization for each library.

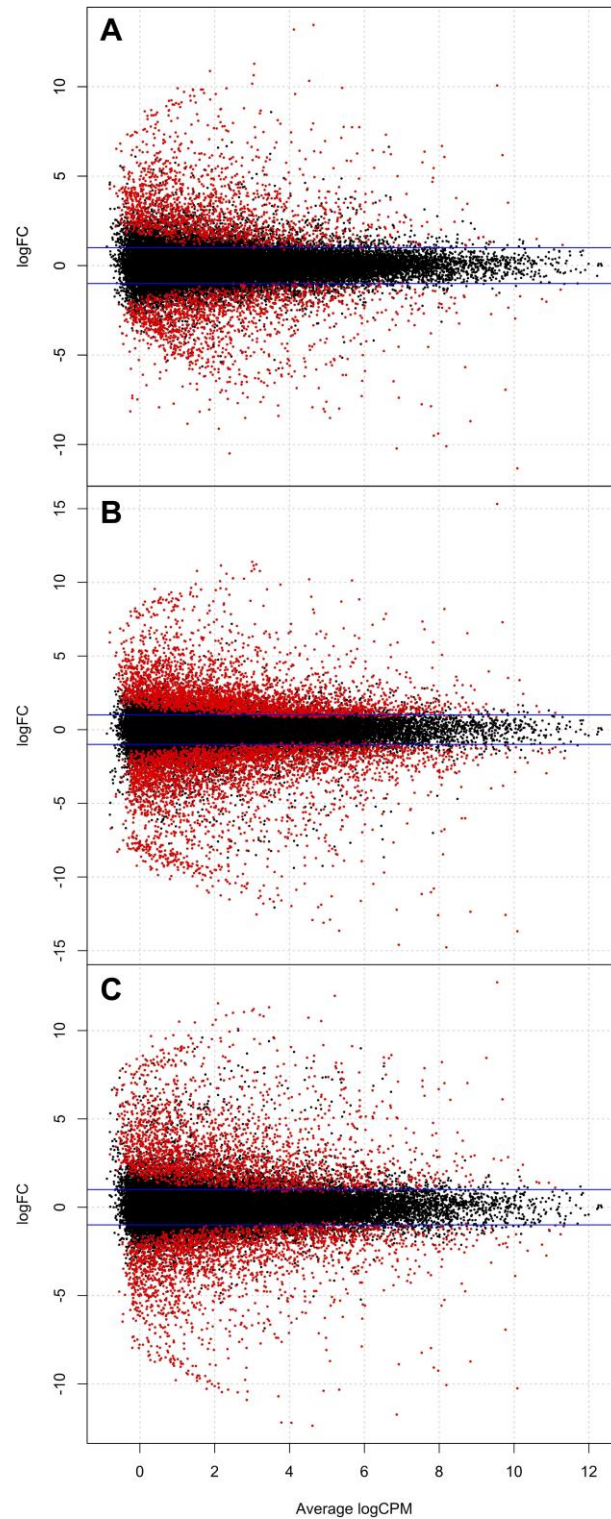

**Fig. S3.** MA plot of differential expression within strain shown as log-fold change of expression versus average log counts per million. (A) E-strain diapause maintenance to day 1, (B) E-strain diapause maintenance to day 7, (C) Z-strain diapause maintenance to day 1, (D) Z-strain diapause maintenance to day 7. Red dots are significantly differentially expressed at  $FDR < 0.01$ .

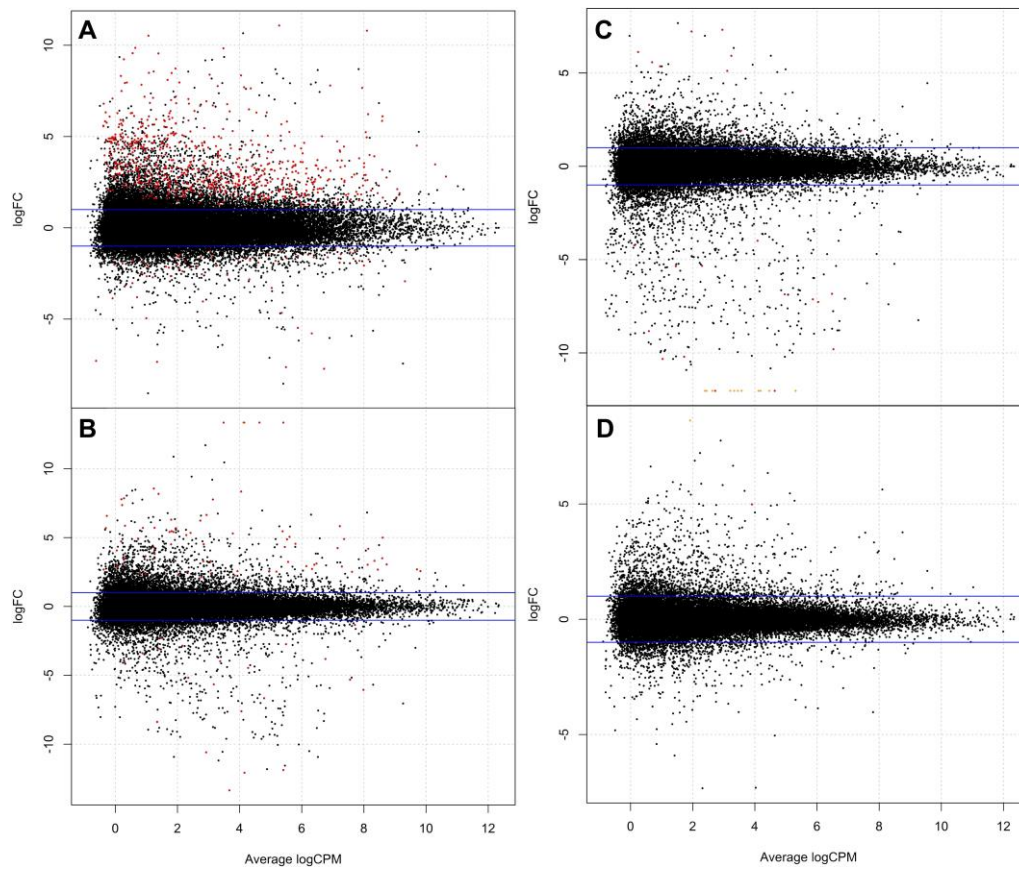

**Fig. S4.** MA plot of differential expression between strains (A) in diapause maintenance, (B) on day 1, and (C) on day 7, shown as log-fold change of expression versus average log counts per million. Red dots are significantly differentially expressed at  $FDR < 0.01$ .

**Table S1. Enriched GO Terms and KEGG Pathways for Differentially Expressed Genes Between E and Z Strains (P-value < 0.001)**

| Category               | Term                                                              | Count | Size | P-value   |
|------------------------|-------------------------------------------------------------------|-------|------|-----------|
| <b>Day1</b>            |                                                                   |       |      |           |
| GO: biological process | proteasome-mediated ubiquitin-dependent protein catabolic process | 30    | 83   | 8.39E-06  |
| GO: biological process | cellular protein catabolic process                                | 43    | 146  | 4.24E-05  |
| GO: biological process | protein-DNA complex subunit organization                          | 17    | 39   | 5.12E-05  |
| GO: biological process | modification-dependent protein catabolic process                  | 42    | 145  | 7.95E-05  |
| GO: biological process | macromolecule catabolic process                                   | 54    | 210  | 2.44E-04  |
| GO: biological process | nucleosome assembly                                               | 8     | 13   | 2.92E-04  |
| GO: biological process | DNA endoreduplication                                             | 8     | 13   | 2.92E-04  |
| GO: biological process | mitotic spindle assembly checkpoint                               | 6     | 8    | 3.88E-04  |
| GO: biological process | spindle checkpoint                                                | 6     | 8    | 3.88E-04  |
| GO: biological process | pyrimidine-containing compound metabolic process                  | 10    | 20   | 4.92E-04  |
| GO: biological process | DNA packaging                                                     | 19    | 54   | 5.57E-04  |
| GO: biological process | regulation of imaginal disc-derived wing size                     | 8     | 14   | 5.85E-04  |
| GO: biological process | regulation of cell cycle process                                  | 39    | 146  | 8.57E-04  |
| GO: biological process | regulation of tube size                                           | 13    | 32   | 8.64E-04  |
| GO: biological process | canonical Wnt signaling pathway                                   | 8     | 21   | 1.35E-02* |
| GO: biological process | regulation of Wnt signaling pathway                               | 15    | 54   | 2.29E-02* |
| GO: molecular function | glucose transmembrane transporter activity                        | 8     | 11   | 5.78E-05  |
| GO: molecular function | copper ion binding                                                | 10    | 17   | 9.61E-05  |
| GO: molecular function | monosaccharide transmembrane transporter activity                 | 9     | 17   | 6.31E-04  |
| GO: molecular function | calcium ion binding                                               | 37    | 135  | 9.43E-04  |
| KEGG Pathway           | Proteasome                                                        | 23    | 33   | 6.69E-12  |
| KEGG Pathway           | Ascorbate and aldarate metabolism                                 | 9     | 13   | 2.82E-05  |
| KEGG Pathway           | Retinol metabolism                                                | 8     | 13   | 2.76E-04  |
| KEGG Pathway           | DNA replication                                                   | 12    | 26   | 3.13E-04  |
| KEGG Pathway           | Non-homologous end-joining                                        | 4     | 4    | 6.94E-04  |
| <b>Day7</b>            |                                                                   |       |      |           |
| GO: biological process | amino sugar metabolic process                                     | 18    | 55   | 2.27E-07  |
| GO: biological process | chitin-based cuticle development                                  | 22    | 79   | 2.62E-07  |
| GO: biological process | chitin metabolic process                                          | 15    | 46   | 2.48E-06  |
| GO: biological process | cuticle chitin catabolic process                                  | 3     | 3    | 5.82E-04  |
| GO: biological process | regulation of hormone levels                                      | 10    | 43   | 2.34E-03  |
| GO: biological process | regulation of tube size                                           | 10    | 44   | 2.81E-03  |
| GO: biological process | regulation of tube architecture, open tracheal system             | 13    | 67   | 3.17E-03  |
| GO: biological process | homophilic cell adhesion                                          | 7     | 25   | 3.48E-03  |
| GO: biological process | cuticle pattern formation                                         | 7     | 25   | 3.48E-03  |
| GO: biological process | aminoglycan catabolic process                                     | 5     | 14   | 4.25E-03  |
| GO: biological process | pyrimidine nucleotide biosynthetic process                        | 4     | 9    | 4.33E-03  |
| GO: biological process | glucosamine-containing compound catabolic process                 | 4     | 9    | 4.33E-03  |

|                        |                                                          |    |     |          |
|------------------------|----------------------------------------------------------|----|-----|----------|
| GO: biological process | pyrimidine nucleoside monophosphate biosynthetic process | 3  | 5   | 5.12E-03 |
| GO: biological process | intercellular transport                                  | 3  | 5   | 5.12E-03 |
| GO: biological process | septate junction assembly                                | 7  | 28  | 6.88E-03 |
| GO: biological process | negative regulation of hormone metabolic process         | 2  | 2   | 6.98E-03 |
| GO: biological process | negative regulation of sequestering of calcium ion       | 2  | 2   | 6.98E-03 |
| GO: biological process | detoxification of arsenic-containing substance           | 2  | 2   | 6.98E-03 |
| GO: biological process | organonitrogen compound metabolic process                | 64 | 572 | 7.93E-03 |
| GO: biological process | cellular hormone metabolic process                       | 7  | 29  | 8.43E-03 |
| GO: biological process | system process                                           | 35 | 279 | 9.17E-03 |
| GO: biological process | activation of immune response                            | 3  | 6   | 9.60E-03 |
| GO: biological process | 'de novo' pyrimidine nucleobase biosynthetic process     | 3  | 6   | 9.60E-03 |
| GO: biological process | pyrimidine nucleoside biosynthetic process               | 3  | 6   | 9.60E-03 |
| GO: molecular function | structural constituent of chitin-based cuticle           | 6  | 7   | 2.32E-06 |
| GO: molecular function | chitin binding                                           | 13 | 39  | 1.22E-05 |
| GO: molecular function | extracellular matrix structural constituent              | 7  | 13  | 3.64E-05 |
| GO: molecular function | structural constituent of chitin-based larval cuticle    | 11 | 32  | 4.16E-05 |
| GO: molecular function | serine-type endopeptidase activity                       | 17 | 69  | 5.16E-05 |
| GO: molecular function | serine hydrolase activity                                | 20 | 91  | 6.74E-05 |
| GO: molecular function | iron ion binding                                         | 16 | 67  | 1.28E-04 |
| GO: molecular function | monosaccharide transmembrane transporter activity        | 7  | 17  | 3.04E-04 |
| GO: molecular function | molybdenum ion binding                                   | 3  | 3   | 6.34E-04 |
| KEGG Pathway           | Drug metabolism - other enzymes                          | 8  | 29  | 4.35E-04 |

\* Asterix indicates *P*-value <0.05

**Table S2. Gene enrichment analysis table for the seven significant STEM profiles (Bonferroni corrected P-value cutoff  $\leq 0.0001$ )**

| Strain | Profile | GO Category Name                                                                 | #Genes Category | #Genes Assigned | #Genes Expected | #Genes Enriched | p-value  | Corrected p-value | Fold |
|--------|---------|----------------------------------------------------------------------------------|-----------------|-----------------|-----------------|-----------------|----------|-------------------|------|
| E      | 1       | single-organism developmental process                                            | 1967            | 83              | 30.8            | 52.2            | 2.70E-15 | 1.10E-11          | 2.7  |
| E      | 1       | macromolecule metabolic process                                                  | 1960            | 82              | 30.6            | 51.4            | 6.30E-15 | 2.70E-11          | 2.7  |
| E      | 1       | regulation of biological process                                                 | 2220            | 84              | 34.7            | 49.3            | 6.10E-13 | 2.60E-09          | 2.4  |
| E      | 1       | regulation of cellular process                                                   | 2066            | 79              | 32.3            | 46.7            | 1.70E-12 | 7.30E-09          | 2.4  |
| E      | 1       | organic substance metabolic process                                              | 2606            | 91              | 40.7            | 50.3            | 5.40E-12 | 2.30E-08          | 2.2  |
| E      | 1       | endopeptidase activity                                                           | 168             | 19              | 2.6             | 16.4            | 2.90E-11 | 1.20E-07          | 7.2  |
| E      | 1       | proteolysis                                                                      | 330             | 26              | 5.2             | 20.8            | 3.10E-11 | 1.30E-07          | 5    |
| E      | 1       | anatomical structure development                                                 | 1064            | 49              | 16.6            | 32.4            | 6.00E-11 | 2.50E-07          | 2.9  |
| E      | 1       | homophilic cell adhesion via plasma membrane adhesion molecules                  | 29              | 9               | 0.5             | 8.5             | 4.20E-10 | 1.80E-06          | 19.8 |
| E      | 1       | developmental process involved in reproduction                                   | 520             | 31              | 8.1             | 22.9            | 4.70E-10 | 2.00E-06          | 3.8  |
| E      | 1       | anatomical structure morphogenesis                                               | 900             | 42              | 14.1            | 27.9            | 9.00E-10 | 3.80E-06          | 3    |
| E      | 1       | proteasome regulatory particle                                                   | 22              | 8               | 0.3             | 7.7             | 9.40E-10 | 4.00E-06          | 23.3 |
| E      | 1       | plasma membrane                                                                  | 417             | 27              | 6.5             | 20.5            | 1.00E-09 | 4.30E-06          | 4.1  |
| E      | 1       | cellular macromolecule metabolic process                                         | 1726            | 63              | 27              | 36              | 1.60E-09 | 6.90E-06          | 2.3  |
| E      | 1       | single organism reproductive process                                             | 548             | 31              | 8.6             | 22.4            | 1.70E-09 | 7.00E-06          | 3.6  |
| E      | 1       | macromolecule catabolic process                                                  | 214             | 19              | 3.3             | 15.7            | 1.80E-09 | 7.70E-06          | 5.7  |
| E      | 1       | negative regulation of cellular process                                          | 756             | 37              | 11.8            | 25.2            | 2.50E-09 | 1.00E-05          | 3.1  |
| E      | 1       | peptidase activity, acting on L-amino acid peptides                              | 268             | 21              | 4.2             | 16.8            | 2.50E-09 | 1.10E-05          | 5    |
| E      | 1       | primary metabolic process                                                        | 2469            | 80              | 38.6            | 41.4            | 2.70E-09 | 1.10E-05          | 2.1  |
| E      | 1       | protein binding                                                                  | 1272            | 51              | 19.9            | 31.1            | 2.80E-09 | 1.20E-05          | 2.6  |
| E      | 1       | ubiquitin-dependent protein catabolic process                                    | 131             | 15              | 2               | 13              | 2.80E-09 | 1.20E-05          | 7.3  |
| E      | 1       | peptidase activity                                                               | 274             | 21              | 4.3             | 16.7            | 3.80E-09 | 1.60E-05          | 4.9  |
| E      | 1       | modification-dependent macromolecule catabolic process                           | 136             | 15              | 2.1             | 12.9            | 4.80E-09 | 2.00E-05          | 7.1  |
| E      | 1       | modification-dependent protein catabolic process                                 | 136             | 15              | 2.1             | 12.9            | 4.80E-09 | 2.00E-05          | 7.1  |
| E      | 1       | proteolysis involved in cellular protein catabolic process                       | 136             | 15              | 2.1             | 12.9            | 4.80E-09 | 2.00E-05          | 7.1  |
| E      | 1       | cellular component organization                                                  | 1534            | 57              | 24              | 33              | 5.10E-09 | 2.10E-05          | 2.4  |
| E      | 1       | protein catabolic process                                                        | 99              | 13              | 1.5             | 11.5            | 5.90E-09 | 2.50E-05          | 8.4  |
| E      | 1       | proteasome-mediated ubiquitin-dependent protein catabolic process                | 83              | 12              | 1.3             | 10.7            | 7.40E-09 | 3.10E-05          | 9.2  |
| E      | 1       | proteasomal protein catabolic process                                            | 84              | 12              | 1.3             | 10.7            | 8.50E-09 | 3.60E-05          | 9.1  |
| E      | 1       | cellular developmental process                                                   | 1249            | 49              | 19.5            | 29.5            | 1.10E-08 | 4.60E-05          | 2.5  |
| E      | 1       | intracellular part                                                               | 3372            | 98              | 52.7            | 45.3            | 1.20E-08 | 5.00E-05          | 1.9  |
| E      | 1       | negative regulation of biological process                                        | 844             | 38              | 13.2            | 24.8            | 1.40E-08 | 5.90E-05          | 2.9  |
| E      | 1       | calcium-dependent cell-cell adhesion via plasma membrane cell adhesion molecules | 21              | 7               | 0.3             | 6.7             | 2.20E-08 | 9.30E-05          | 21.3 |
| E      | 2       | nucleus                                                                          | 1056            | 48              | 17.1            | 30.9            | 4.80E-10 | 2.00E-06          | 2.8  |
| E      | 2       | protein catabolic process                                                        | 99              | 14              | 1.6             | 12.4            | 9.20E-10 | 3.90E-06          | 8.7  |
| E      | 2       | single-organism developmental process                                            | 1967            | 71              | 31.9            | 39.1            | 1.20E-09 | 5.10E-06          | 2.2  |
| E      | 2       | modification-dependent macromolecule catabolic process                           | 136             | 15              | 2.2             | 12.8            | 7.80E-09 | 3.30E-05          | 6.8  |
| E      | 2       | modification-dependent protein catabolic process                                 | 136             | 15              | 2.2             | 12.8            | 7.80E-09 | 3.30E-05          | 6.8  |
| E      | 2       | proteolysis involved in cellular protein catabolic process                       | 136             | 15              | 2.2             | 12.8            | 7.80E-09 | 3.30E-05          | 6.8  |
| E      | 2       | proteasome-mediated ubiquitin-dependent protein catabolic process                | 83              | 12              | 1.3             | 10.7            | 1.10E-08 | 4.70E-05          | 8.9  |
| E      | 2       | proteasomal protein catabolic process                                            | 84              | 12              | 1.4             | 10.6            | 1.30E-08 | 5.40E-05          | 8.8  |
| E      | 2       | anatomical structure development                                                 | 1064            | 45              | 17.3            | 27.7            | 1.40E-08 | 5.90E-05          | 2.6  |
| E      | 2       | cellular response to DNA damage stimulus                                         | 234             | 19              | 3.8             | 15.2            | 1.40E-08 | 6.10E-05          | 5    |
| E      | 2       | macromolecule catabolic process                                                  | 214             | 18              | 3.5             | 14.5            | 2.00E-08 | 8.40E-05          | 5.2  |

|   |   |                                           |      |    |      |      |          |          |     |
|---|---|-------------------------------------------|------|----|------|------|----------|----------|-----|
| E | 3 | oxidoreductase activity                   | 380  | 42 | 6.1  | 35.9 | 3.00E-22 | 1.30E-18 | 6.9 |
| E | 3 | oxidation-reduction process               | 325  | 33 | 5.2  | 27.8 | 1.00E-16 | 4.30E-13 | 6.3 |
| E | 3 | single-organism metabolic process         | 1304 | 61 | 20.9 | 40.1 | 4.60E-13 | 1.90E-09 | 2.9 |
| E | 3 | integral component of membrane            | 613  | 36 | 9.8  | 26.2 | 6.00E-11 | 2.50E-07 | 3.7 |
| E | 3 | organic acid metabolic process            | 264  | 23 | 4.2  | 18.8 | 9.10E-11 | 3.80E-07 | 5.4 |
| E | 3 | oxoacid metabolic process                 | 264  | 23 | 4.2  | 18.8 | 9.10E-11 | 3.80E-07 | 5.4 |
| E | 3 | carboxylic acid metabolic process         | 249  | 22 | 4    | 18   | 1.80E-10 | 7.40E-07 | 5.5 |
| E | 3 | small molecule metabolic process          | 498  | 30 | 8    | 22   | 1.20E-09 | 5.20E-06 | 3.8 |
| E | 3 | carbohydrate metabolic process            | 207  | 18 | 3.3  | 14.7 | 9.80E-09 | 4.10E-05 | 5.4 |
| E | 3 | organonitrogen compound metabolic process | 431  | 26 | 6.9  | 19.1 | 1.50E-08 | 6.20E-05 | 3.8 |
| E | 4 | oxidoreductase activity                   | 380  | 22 | 3.8  | 18.2 | 7.60E-11 | 3.20E-07 | 5.8 |
| E | 4 | oxidation-reduction process               | 325  | 20 | 3.2  | 16.8 | 1.80E-10 | 7.80E-07 | 6.2 |
| E | 4 | single-organism catabolic process         | 190  | 14 | 1.9  | 12.1 | 9.80E-09 | 4.10E-05 | 7.4 |

**Table S3. Significance (FDR) values for differentially expressed genes between E and Z strain moths in long-day conditions**

| Gene Symbol       | Contigs                                                   | FDR Day 1          | FDR Day 7 |
|-------------------|-----------------------------------------------------------|--------------------|-----------|
| <b>Ecdysone</b>   |                                                           |                    |           |
| <i>Usp</i>        | comp37290_c0_seq1*; comp10851_c0_seq1; comp108932_c0_seq1 | 8.26E-03           | 5.41E-03  |
| <i>Spo</i>        | comp30567_c0_seq1                                         | 4.63E-07           | 9.21E-10  |
| <i>Phm</i>        | comp24584_c0_seq1                                         | 3.76E-06           | 2.69E-05  |
| <i>Eip75B</i>     | comp18210_c0_seq1; comp11010_c0_seq2*                     | 6.48E-03           | -         |
| <i>Eip78C</i>     | comp122877_c0_seq1; comp151979_c0_seq1                    | -                  | -         |
| <i>EcR</i>        | comp34369_c0_seq1                                         | 1.01E-03           | -         |
| <i>Nvd</i>        | comp8057_c0_seq2                                          | 8.88E-03           | 2.62E-03  |
| <b>Circadian</b>  |                                                           |                    |           |
| <i>Clk</i>        | comp120765_c0_seq1                                        | -                  | -         |
| <i>Cpo</i>        | comp89983_c0_seq1                                         | -                  | -         |
| <i>Cyc</i>        | comp120765_c0_seq1                                        | -                  | -         |
| <i>Pdp1</i>       | comp36140_c0_seq1*; comp15799_c0_seq1*                    | 9.33E-03; 8.35E-04 | -         |
| <i>Tim</i>        | comp27153_c0_seq1                                         | -                  | -         |
| <i>Vri</i>        | comp23405_c0_seq1                                         | -                  | -         |
| <i>Per</i>        | comp7426_c0_seq1; comp8184_c0_seq1; comp97089_c0_seq1     | -                  | -         |
| <b>Cell Cycle</b> |                                                           |                    |           |
| <i>Cdk4</i>       | comp127995_c0_seq1*; comp233925_c0_seq1*                  | 2.61E-03; 1.22E-04 | -         |
| <i>CycB</i>       | comp21605_c0_seq1                                         | 1.32E-07           | 5.73E-04  |
| <i>Pcna</i>       | comp9566_c0_seq1                                          | 2.38E-06           | -         |
| <i>Polo</i>       | comp21903_c0_seq1*; comp10877_c0_seq1*                    | 2.22E-03; 1.56E-03 | -         |
| <i>CycA</i>       | comp29198_c0_seq1                                         | -                  | -         |
| <i>Trbl</i>       | comp20015_c0_seq1; comp25406_c0_seq1                      | -                  | -         |
| <b>Heat Shock</b> |                                                           |                    |           |
| <i>Hsp83</i>      | comp22537_c0_seq1                                         | 5.03E-04           | -         |



|                                |                                                                                                |          |          |
|--------------------------------|------------------------------------------------------------------------------------------------|----------|----------|
| <i>Hsp60</i>                   | comp19138_c0_seq1                                                                              | 8.82E-03 | -        |
| <i>Hsp70Bc</i>                 | comp418731_c0_seq1; comp427912_c0_seq1                                                         | -        | -        |
| <i>Hsp70Ab</i>                 | comp9675_c0_seq1                                                                               | -        | -        |
| <b>Canonical Wnt Signaling</b> |                                                                                                |          |          |
| <i>Fz3</i>                     | comp15297_c0_seq1                                                                              | 3.93E-03 | -        |
| <i>Arm</i>                     | comp17057_c0_seq1                                                                              | 9.38E-03 | -        |
| <i>Smo</i>                     | comp14234_c0_seq1                                                                              | 7.71E-03 | -        |
| <i>Wg</i>                      | comp13981_c0_seq1                                                                              | 1.91E-03 | -        |
| <i>Wnt6</i>                    | comp25466_c0_seq1                                                                              | -        | -        |
| <i>Hs6st</i>                   | comp78453_c0_seq1                                                                              | -        | -        |
| <i>Gro</i>                     | comp8218_c0_seq1                                                                               | -        | -        |
| <i>Pan</i>                     | -                                                                                              | 7.04E-03 | -        |
| <b>Insulin</b>                 |                                                                                                |          |          |
| <i>Akt1</i>                    | comp18543_c0_seq1; comp38567_c0_seq1; comp53008_c0_seq1; comp10465_c0_seq1                     | -        | -        |
| <i>Foxo</i>                    | comp19046_c0_seq1                                                                              | -        | -        |
| <i>InR</i>                     | comp25612_c0_seq1; comp14287_c0_seq1; comp16806_c0_seq1; comp22132_c0_seq1; comp223642_c0_seq1 | -        | -        |
| <i>Pi3k</i>                    | comp190582_c0_seq1; comp28365_c0_seq1; comp31462_c0_seq1                                       | -        | -        |
| <i>Pten</i>                    | comp6369_c0_seq1; comp7648_c0_seq1                                                             | -        | -        |
| <i>SNF4y</i>                   | comp26437_c0_seq1                                                                              | -        | 3.11E-03 |
| <i>Tor</i>                     | comp16536_c0_seq1; comp17899_c0_seq1; comp19143_c0_seq1; comp26489_c0_seq1                     | -        | -        |

\*Some genes had multiple transcripts, asterix denotes which transcript shows differential expression

**Table S4. Short read archive accession numbers**

| <b>Strain</b> | <b>Days After Long-day Exposure</b> | <b>Sample Name</b>        | <b>SRA Accession</b> |
|---------------|-------------------------------------|---------------------------|----------------------|
| E             | 0                                   | Shortday_E_biologicalrep1 | SRX1206058           |
| E             | 0                                   | Shortday_E_biologicalrep2 | SRX1206872           |
| E             | 0                                   | Shortday_E_biologicalrep3 | SRX1211504           |
| E             | 0                                   | Shortday_E_biologicalrep4 | SRX1211546           |
| E             | 0                                   | Shortday_E_biologicalrep5 | SRX1211572           |
| Z             | 0                                   | Shortday_Z_biologicalrep1 | SRX1211612           |
| Z             | 0                                   | Shortday_Z_biologicalrep2 | SRX1211648           |
| Z             | 0                                   | Shortday_Z_biologicalrep3 | SRX1211686           |
| Z             | 0                                   | Shortday_Z_biologicalrep4 | SRX1211701           |
| Z             | 0                                   | Shortday_Z_biologicalrep5 | SRX1211703           |
| E             | 1                                   | Longday1_E_biologicalrep1 | SRX1211704           |
| E             | 1                                   | Longday1_E_biologicalrep2 | SRX1211706           |
| E             | 1                                   | Longday1_E_biologicalrep3 | SRX1211707           |
| E             | 1                                   | Longday1_E_biologicalrep4 | SRX1211711           |
| E             | 1                                   | Longday1_E_biologicalrep5 | SRX1211709           |
| Z             | 1                                   | Longday1_Z_biologicalrep1 | SRX1211714           |
| Z             | 1                                   | Longday1_Z_biologicalrep2 | SRX1211718           |
| Z             | 1                                   | Longday1_Z_biologicalrep3 | SRX1211716           |
| Z             | 1                                   | Longday1_Z_biologicalrep4 | SRX1211720           |
| Z             | 1                                   | Longday1_Z_biologicalrep5 | SRX1211723           |
| E             | 7                                   | Longday7_E_biologicalrep1 | SRX1211725           |
| E             | 7                                   | Longday7_E_biologicalrep2 | SRX1211741           |
| E             | 7                                   | Longday7_E_biologicalrep3 | SRX1211744           |
| E             | 7                                   | Longday7_E_biologicalrep4 | SRX1211746           |
| E             | 7                                   | Longday7_E_biologicalrep5 | SRX1211748           |
| Z             | 7                                   | Longday7_Z_biologicalrep1 | SRX1211750           |
| Z             | 7                                   | Longday7_Z_biologicalrep2 | SRX1211752           |
| Z             | 7                                   | Longday7_Z_biologicalrep3 | SRX1211782           |
| Z             | 7                                   | Longday7_Z_biologicalrep4 | SRX1211784           |
| Z             | 7                                   | Longday7_Z_biologicalrep5 | SRX1211786           |
